# Supplementary material for: The effects of preoperative inflammatory index and immune function on the prognosis of thyroid cancer
Source: Research Square preprint supplement (doi:10.21203/rs.3.rs-6221470/v1), 2025-04-02
Supplement: Supplementary file 1 [file 678708d70e138b981b4dc066.docx]

**Tab****le 1** The clinical characteristics of 430 thyroid cancer patients

| **Characteristics** | n |
| --- | --- |
| **Gender** |  |
| Male/Female | 91/339 |
| **Age** |  |
| ≤50years/>50 years | 256/174 |
| **Pathological type** |  |
| papillarycarcinoma/follicular carcinoma | 306/124 |
| **lesion** |  |
| Single/multiple | 386/44 |
| **Stage** |  |
| I–II/III–IV | 294/136 |
| **Lymph node status** |  |
| Negative/Positive | 267/163 |
| **Distant metastasis** |  |
| Negative/Positive | 396/34 |

**Table 2** The comparison of SII, Tg, and TgAb levels among thyroid cancer group, thyroid nodule group, and healthy control group

| **Group** | **n** | **SII** | **Tg** | **TgAb** |
| --- | --- | --- | --- | --- |
| **Healthy Control Group** | 50 | 216.13±67.23 | 25.87±3.85 | 80.74±19.62 |
| **Thyroid Nodule** | 100 | 332.57±123.64* | 52.79±5.81* | 198.84±56.63* |
| **Thyroid Cancer** | 430 | 576.35±136.79*# | 85.69±22.38*# | 316.05±105.78*# |
| **F** |  | 176.51 | 24.36 | 86.63 |
| **P** |  | ＜0.001 | ＜0.001 | ＜0.001 |

Note: Data are presented as mean ± SD; * *P* < 0.05 vs. Healthy Control Group; # *P* < 0.05 vs. Thyroid Nodule Group.

**Table 3** The comparison of SII, Tg, and TgAb levels in thyroid cancer patients with different clinicopathological characteristics

| **Index** | **n** | **SII** | **Χ2** | **P** | **Tg(****μg/L)** | **Χ2** | **P** | **TgAb(****IU/ml)** | **Χ2** | **P** |
| --- | --- | --- | --- | --- | --- | --- | --- | --- | --- | --- |
| **Gender** |  |  | 3.562 | 0.946 |  | 2.392 | 0.814 |  | 0.298 | 0.712 |
| Male | 91 | 579.63±26.68 |  |  | 23.95±5.84 |  |  | 52.36±4.67 |  |  |
| Female | 339 | 575.68±37.89 |  |  | 24.02±6.83 |  |  | 53.26±5.63 |  |  |
| **Age** |  |  | 2.159 | 0.687 |  | 1.926 | 0.717 |  | 0.623 | 0.701 |
| ≤50 years | 256 | 574.59±32.59 |  |  | 22.69±5.13 |  |  | 51.96±4.68 |  |  |
| ＞50 years | 174 | 577.89±42.59 |  |  | 23.74±4.98 |  |  | 52.59±5.13 |  |  |
| **Pathological type** |  |  | 17.100 | 0.008 |  | 2.623 | 0.659 |  | 0.749 | 0.589 |
| Follicular carcinoma | 124 | 577.80±43.98 |  |  | 20.36±6.03 |  |  | 52.48±4.68 |  |  |
| Papillary carcinoma | 306 | 503.59±35.69 |  |  | 21.38±6.32 |  |  | 53.26±5.39 |  |  |
| **Lymph node**  **status** |  |  | 13.652 | 0.016 |  | 19.203 | ＜0.001 |  | 14.208 | 0.011 |
| Positive | 163 | 593.23±55.63 |  |  | 38.79±7.23 |  |  | 72.36±9.26 |  |  |
| Negative | 267 | 400.26±69.26 |  |  | 18.26±6.23 |  |  | 32.68±7.09 |  |  |
| **Distant metastasis** |  |  | 21.652 | ＜0.001 |  | 16.387 | ＜0.001 |  | 21.682 | ＜0.001 |
| Positive | 34 | 613.68±75.69 |  |  | 46.29±8.26 |  |  | 69.98±8.36 |  |  |
| Negative | 396 | 564.59±68.59 |  |  | 23.68±8.59 |  |  | 28.69±6.98 |  |  |

**Table 4** The univariate and multivariate analysis of thyroid cancer patients

| **Index** | **univariate** | | | **multivariate** | | |
| --- | --- | --- | --- | --- | --- | --- |
| HR | 95%CI | P **值** | HR | 95%CI | P **值** |
| **Gender** | 1.780 | 0.543-4.329 | 0.826 | - | - | - |
| **Age** | 1.726 | 1.244-3.435 | 0.035 | 1.549 | 1.326-2.849 | 0.019 |
| **Pathological type** | 2.879 | 1.921-4.386 | 0.009 | 2.349 | 2.362-4.753 | ＜0.001 |
| **Lymph node metastasis** | 1.791 | 1.072-2.789 | 0.034 | 1.539 | 1.324-3.216 | ＜0.001 |
| **Distant metastasis** | 2.343 | 1.509-2.928 | ＜0.001 | 2.121 | 1.235-3.096 | ＜0.001 |
| **SII** | 2.269 | 1.298-4.213 | ＜0.001 | 2.946 | 2.016-4.679 | 0.001 |
| **Tg** | 1.759 | 1.026-2.902 | 0.006 | 1.516 | 1.123-2.849 | 0.008 |
| **TgAb** | 1.920 | 1.023-3.468 | 0.038 | 1.729 | 1.426-3.756 | 0.027 |
| **CD3+ cell（%）** | 1.272 | 0.959-1.849 | ＜0.001 | 1.126 | 0.849-1.516 | 0.094 |
| **CD4+ cell（%）** | 1.161 | 1.056-1.265 | 0.021 | 1.329 | 1.146-1.902 | 0.074 |
| **CD8+ cell（%）** | 0.829 | 0.736-2.469 | 0.008 | 0.946 | 0.529-2.759 | 0.013 |
| **CD56+ cell（%）** | 1.313 | 1.231-2.198 | 0.386 | - | - | - |
| **CD19+ cell（%）** | 0.708 | 0.659-1.869 | 0.866 | - | - | - |

Note:Gender: male vs. female, Age:(≤50years vs. >50 years), Pathological type: papillary carcinoma vs. follicular carcinoma, Lymph node metastasis: negative vs. positive, Distant metastasis: negative vs. positive, SII: (<576.48 vs. ≥576.48 ), Tg: (<23.99 μg/L vs. ≥23.99 μg/L), TgAb:(<53.10 IU/mL vs. ≥53.10 IU/mL), CD3+ cells(%):(<70.15% vs. ≥70.15%), CD4+ cells (%):( <36.64% vs. ≥36.64%), CD8+ cells (%):(<28.86% vs. ≥28.86% )
